# Supplementary material for: Reduced levels of ALS gene DCTN1 induce motor defects in Drosophila
Source: Front Neurosci. 2023 Jun 9;17:1164251. doi: 10.3389/fnins.2023.1164251 (PMC10289029; doi:10.3389/fnins.2023.1164251)
Supplement: Supplementary file 1 [file Table_1.XLSX]

## Sheet: Dataset S1
Dataset S1. DEGs identified by RNA-Seq on Dctn1 knockdown
GeneID	Symbol	log2FoldChange (Dctn1-IR[1]/Driver Control)	Padj	-log10(Padj)	Up/Down-Regulation
318098	CG32581	5.18843	4.68992e-59	58.3288	Up
318136	CG32641	4.98803	1.31861e-51	50.8799	Up
12798151	CG43133	3.5275	7.2378e-31	30.1404	Up
32952	CG14205	3.20358	2.18056e-21	20.6614	Up
39248	CG12522	3.18079	2.12046e-23	22.6736	Up
39909	Ilp8	3.15078	3.60494e-18	17.4431	Up
117462	TotC	2.73092	7.15615e-12	11.1453	Up
43056	CG11893	2.59472	1.51106e-16	15.8207	Up
39246	CG32071	2.40479	1.12682e-14	13.9481	Up
36434	CG13324	2.36532	3.66484e-22	21.4359	Up
43800	CG1909	2.32667	2.31099e-47	46.6362	Up
43059	CG13659	2.25933	1.35399e-21	20.8684	Up
48338	GstD5	2.18893	3.25881e-09	8.48694	Up
36701	CG8160	2.02219	1.30696e-10	9.88374	Up
5740186	CG34265	2.01509	2.55585e-13	12.5925	Up
36433	CG13323	2.00756	2.47898e-19	18.6057	Up
34123	CG8353	1.95156	2.76827e-09	8.55779	Up
49821	EbpIII	1.94323	3.44165e-25	24.4632	Up
48335	GstD2	1.9425	1.01702e-09	8.99267	Up
34182	Bace	1.92179	1.62925e-08	7.78801	Up
41561	Gnmt	1.81294	3.82557e-10	9.4173	Up
317919	CG32214	1.80286	5.93385e-06	5.22666	Up
36530	CG6337	1.79492	2.12596e-22	21.6724	Up
41631	CG15887	1.77268	5.4323e-06	5.26502	Up
39681	obst-H	1.74796	1.2683e-16	15.8968	Up
40899	alpha-Est8	1.71863	5.15325e-09	8.28792	Up
37058	CG10911	1.71783	1.17749e-15	14.929	Up
10178785	CG42832	1.71677	8.47125e-06	5.07205	Up
41233	Npc2c	1.7047	2.86965e-12	11.5422	Up
41893	CG44014	1.69709	4.46399e-22	21.3503	Up
36163	Spn47C	1.69248	1.1833e-18	17.9269	Up
326221	CG32557	1.67454	2.48365e-10	9.60491	Up
40365	CG12971	1.66111	6.20895e-05	4.20698	Up
40976	CG11671	1.62836	2.85989e-06	5.54365	Up
31854	CG12057	1.62415	6.16116e-08	7.21034	Up
5740423	CG34184	1.61782	2.85989e-06	5.54365	Up
3885639	CG33985	1.61648	1.70454e-18	17.7684	Up
50424	Muc26B	1.61054	7.72516e-06	5.11209	Up
38310	CG16762	1.59464	1.94428e-08	7.71124	Up
32813	upd1	1.57087	8.79548e-07	6.05574	Up
317856	CG32107	1.57051	3.80507e-07	6.41964	Up
318567	CG31041	1.54916	0.000257737	3.58882	Up
12798293	CG43182	1.54439	7.99223e-08	7.09733	Up
39992	CG5506	1.52455	1.69901e-12	11.7698	Up
36437	CG13325	1.52015	3.72321e-12	11.4291	Up
42094	CG17283	1.51215	0.00011308	3.94661	Up
BGI_novel_G000057	NA	1.48814	4.4207e-08	7.35451	Up
BGI_novel_G000061	NA	1.48513	0.000289321	3.53862	Up
32174	Muc11A	1.48295	1.17749e-15	14.929	Up
39462	CG10943	1.47197	2.03699e-06	5.69101	Up
33413	CG16995	1.46866	1.347e-06	5.87063	Up
3355165	CG40485	1.45457	0.000137141	3.86283	Up
41541	CG5961	1.43564	6.64995e-12	11.1772	Up
43050	CG11878	1.40042	2.0291e-05	4.6927	Up
31196	CG3457	1.39732	7.92428e-06	5.10104	Up
31271	w	1.39548	1.43879e-11	10.842	Up
48337	GstD4	1.39546	7.19719e-05	4.14284	Up
36744	CG12970	1.36915	0.00381402	2.41862	Up
43034	CG10420	1.36545	6.64481e-06	5.17752	Up
36666	Cyp6a8	1.36476	9.53787e-07	6.02055	Up
37309	CG11192	1.36409	0.000793439	3.10049	Up
14462476	CG44013	1.35521	2.16624e-07	6.66429	Up
32127	CG15221	1.35316	1.43448e-06	5.8433	Up
41314	CG14695	1.34263	1.46231e-06	5.83496	Up
36006	CG1698	1.3351	1.37912e-08	7.8604	Up
32950	CG14204	1.33476	0.00544899	2.26368	Up
318749	CG31464	1.32672	8.31971e-06	5.07989	Up
44121	TotA	1.32603	0.00042832	3.36823	Up
36532	CG6357	1.32365	1.0968e-23	22.9599	Up
35708	CG2064	1.311	1.98564e-06	5.7021	Up
31751	CG2278	1.30762	0.003066	2.51343	Up
42122	AttD	1.30197	0.00196877	2.7058	Up
38292	CG13806	1.299	4.12076e-07	6.38502	Up
33040	Obp19d	1.29836	0.00467131	2.33056	Up
36124	CG12934	1.28836	1.05442e-14	13.977	Up
35080	CG15153	1.28119	6.59908e-16	15.1805	Up
32709	CG5162	1.27902	1.95207e-07	6.70951	Up
12798466	CG43236	1.27098	0.000415097	3.38185	Up
40471	CG11426	1.26486	3.00689e-11	10.5219	Up
42651	tHMG2	1.25703	0.00902573	2.04452	Up
37052	CG10910	1.25325	3.25881e-09	8.48694	Up
42264	CG14292	1.23902	3.84885e-06	5.41467	Up
39756	CG13075	1.23671	7.24152e-08	7.14017	Up
50208	CG16836	1.23331	0.0135081	1.8694	Up
246601	CG30413	1.21884	0.00474782	2.32351	Up
34638	Phae2	1.21539	0.000110553	3.95643	Up
43613	CG15534	1.21495	5.15325e-09	8.28792	Up
50206	CG15068	1.21161	0.000268288	3.5714	Up
32835	CG15043	1.20794	2.47924e-12	11.6057	Up
42022	CG17560	1.19672	0.0135781	1.86716	Up
31457	NAAT1	1.19093	8.32253e-13	12.0797	Up
33420	CG3597	1.18917	3.33426e-05	4.477	Up
35521	CG7881	1.18865	4.38732e-07	6.3578	Up
39825	CG44836	1.18263	0.00651198	2.18629	Up
36635	Dro	1.18047	0.0149405	1.82563	Up
32951	CG14219	1.1789	0.00549773	2.25982	Up
48339	GstD6	1.17435	0.00912759	2.03964	Up
3355171	FucTC	1.17185	6.17183e-05	4.20959	Up
33303	CG5118	1.16856	0.000132318	3.87838	Up
40923	CG18268	1.15985	7.53873e-05	4.1227	Up
32392	CG9411	1.15669	0.00269631	2.56923	Up
44269	sut2	1.15656	2.20962e-05	4.65568	Up
50207	CG15065	1.15248	0.0137469	1.86179	Up
34236	Or30a	1.13812	0.0283705	1.54713	Up
318231	Sdic3	1.13021	1.73605e-05	4.76044	Up
12798308	CG43400	1.1284	0.0253869	1.59539	Up
19835787	CG43784	1.12815	0.0133795	1.87356	Up
12798449	CG43175	1.12359	0.00152106	2.81785	Up
43295	CG3339	1.12329	0.0313097	1.50432	Up
43304	Cyp6a18	1.11078	5.56837e-07	6.25427	Up
37314	CG18067	1.1082	1.18075e-12	11.9278	Up
36883	CG5550	1.10594	0.000585993	3.23211	Up
33510	CG17224	1.09987	0.0112028	1.95067	Up
42348	Naam	1.09843	1.57757e-05	4.80201	Up
43646	CG11313	1.097	3.54709e-08	7.45013	Up
30984	pcl	1.09066	8.89706e-06	5.05075	Up
36511	CG42807	1.09026	0.0161753	1.79115	Up
42962	Esp	1.08061	1.4334e-06	5.84363	Up
34808	Ance-3	1.08031	6.98501e-05	4.15583	Up
36016	CG1667	1.07838	0.00141399	2.84955	Up
33885	CG9498	1.07681	0.000935036	3.02917	Up
34219	CG18088	1.07458	8.289e-05	4.0815	Up
35543	Cyp6w1	1.07051	0.00115154	2.93872	Up
41210	CG8534	1.0643	6.86665e-06	5.16326	Up
40751	CG1077	1.06407	0.0483638	1.31548	Up
30980	y	1.06283	4.58218e-05	4.33893	Up
34146	CG14273	1.06121	9.69249e-08	7.01356	Up
318943	CG31789	1.05799	3.66815e-08	7.43555	Up
45706	Cyp4d14	1.05714	0.00147407	2.83148	Up
39824	Gagr	1.04917	1.43448e-06	5.8433	Up
12798343	CG43351	1.04633	7.62943e-05	4.11751	Up
34226	Try29F	1.04089	0.0480468	1.31834	Up
39567	Sox21a	1.03989	0.000325906	3.48691	Up
12798207	CG43064	1.0289	0.0278933	1.5545	Up
3885606	CG34043	1.02848	2.16624e-07	6.66429	Up
318744	CG31454	1.01874	0.000427966	3.36859	Up
36353	Cpr49Ag	1.01542	6.96434e-07	6.15712	Up
41236	CG5361	1.0135	0.000690226	3.16101	Up
32018	CG2157	1.01201	0.000120288	3.91978	Up
35587	Cyp6a2	1.00962	0.00295857	2.52892	Up
246443	CG30082	1.00746	0.0164858	1.78289	Up
40209	obst-F	-1.00171	0.000199223	3.70066	Down
33708	Jon25Bi	-1.00203	1.73605e-05	4.76044	Down
43538	CG15515	-1.00414	0.00817031	2.08776	Down
5740408	CG17707	-1.00531	0.0137469	1.86179	Down
42636	CG13847	-1.00924	0.00786982	2.10404	Down
33548	CG15408	-1.00937	0.00287569	2.54126	Down
40069	CG3819	-1.01243	0.00134426	2.87152	Down
34052	Acp1	-1.02732	0.0153098	1.81503	Down
41454	CG3397	-1.02935	0.00376895	2.42378	Down
317939	CG32249	-1.02968	2.23031e-06	5.65164	Down
317938	CG32248	-1.03657	0.0417381	1.37947	Down
34053	CG7214	-1.03834	0.00064876	3.18792	Down
50467	CG17325	-1.03912	1.58597e-06	5.79971	Down
34017	CG5177	-1.04149	2.92706e-10	9.53357	Down
10178777	CG42835	-1.04211	0.0327773	1.48443	Down
43052	CG10514	-1.0482	0.00671496	2.17296	Down
35859	PGRP-SC1a	-1.05194	0.0462293	1.33508	Down
34022	CG5958	-1.05637	2.1822e-06	5.66111	Down
2768965	AsnS	-1.05996	4.5682e-07	6.34025	Down
40067	CG6839	-1.06001	0.00164044	2.78504	Down
3772322	CG33687	-1.0619	0.0435867	1.36065	Down
31494	CG15773	-1.06227	5.57566e-05	4.2537	Down
42762	CG4408	-1.06454	0.00106232	2.97374	Down
41595	yellow-f	-1.06856	0.0193823	1.71259	Down
33540	CG9664	-1.06946	0.00137096	2.86298	Down
31917	Ser7	-1.0767	0.0325748	1.48712	Down
31257	CG2680	-1.08168	1.02804e-06	5.98799	Down
42796	Gba1a	-1.08284	5.29793e-05	4.27589	Down
35519	CG43366	-1.08478	0.00035943	3.44439	Down
38548	CG11345	-1.08577	4.9932e-05	4.30162	Down
32423	Eo	-1.08785	5.47404e-05	4.26169	Down
34176	fu12	-1.09127	7.6029e-07	6.11902	Down
38791	CG14826	-1.09577	0.0379877	1.42036	Down
33667	CG3355	-1.09673	0.0289577	1.53824	Down
317934	CG32241	-1.10089	0.0136198	1.86583	Down
35719	CG1942	-1.10325	6.75219e-07	6.17056	Down
39536	DCTN1-p150	-1.10773	4.83795e-20	19.3153	Down
246565	Mal-A6	-1.1086	0.000114318	3.94189	Down
40727	CG1208	-1.10902	0.00156707	2.80491	Down
37428	CG10505	-1.11511	1.41403e-05	4.84954	Down
37108	GstE3	-1.11914	1.15619e-05	4.93697	Down
246579	CG30380	-1.12399	0.00806065	2.09363	Down
39354	CG17826	-1.12405	5.57521e-05	4.25374	Down
40372	Alp1	-1.12784	0.00140913	2.85105	Down
44921	Hsp70Ba	-1.13044	0.0197502	1.70443	Down
43072	tobi	-1.13575	4.15683e-06	5.38124	Down
42092	CREG	-1.1358	0.00185403	2.73188	Down
34203	LManIII	-1.13763	6.94077e-05	4.15859	Down
38953	Jon66Cii	-1.13806	2.05314e-06	5.68758	Down
37675	CG13545	-1.14132	1.73605e-05	4.76044	Down
43479	CG7567	-1.14587	1.43342e-09	8.84363	Down
7354382	CG42305	-1.14866	0.000452777	3.34412	Down
32834	CG15044	-1.15131	4.20372e-06	5.37637	Down
246624	CG30458	-1.15716	0.023016	1.63797	Down
2768883	Sdic2	-1.16043	0.0144299	1.84074	Down
32773	CG6788	-1.16114	0.0232061	1.6344	Down
33706	Jon25Biii	-1.16176	1.347e-06	5.87063	Down
43249	CG17191	-1.16306	0.00131464	2.88119	Down
39392	Est-6	-1.17569	4.14197e-05	4.38279	Down
33570	CG15414	-1.1768	6.28585e-05	4.20164	Down
41036	CG11760	-1.17744	0.00206779	2.68449	Down
40267	mag	-1.17891	6.52218e-05	4.18561	Down
36351	Cpr49Ae	-1.18361	6.52218e-05	4.18561	Down
38753	Prat2	-1.1846	2.43881e-05	4.61282	Down
34623	CG14945	-1.1901	9.08116e-06	5.04186	Down
37206	wbl	-1.19267	0.0129005	1.88939	Down
3885656	CG34045	-1.19492	0.00842938	2.0742	Down
37887	CG3394	-1.19522	7.05242e-05	4.15166	Down
5740825	CG34305	-1.19607	0.000589755	3.22933	Down
36798	CG7798	-1.22745	0.00618286	2.20881	Down
5740612	CG34451	-1.23909	9.24865e-07	6.03392	Down
35222	CG10237	-1.25231	3.22121e-14	13.492	Down
34812	CG16884	-1.25351	2.8674e-07	6.54251	Down
37212	CG18606	-1.25389	0.00939624	2.02705	Down
317909	CG32198	-1.25714	0.00324684	2.48854	Down
32719	CG8664	-1.25771	4.97146e-06	5.30352	Down
32728	CG8568	-1.26263	0.00498706	2.30216	Down
39546	CG9040	-1.26342	2.15333e-06	5.66689	Down
38074	CG13893	-1.26451	3.27046e-11	10.4854	Down
10178916	CG42822	-1.28085	0.00154527	2.811	Down
38127	LysD	-1.28145	0.00266777	2.57385	Down
39648	CG16959	-1.28316	2.75642e-05	4.55966	Down
40893	CG14598	-1.28503	7.16213e-05	4.14496	Down
3346223	CG33511	-1.28617	0.00141399	2.84955	Down
50415	CG15308	-1.2884	0.00209853	2.67808	Down
38129	LysP	-1.29219	0.000163097	3.78755	Down
32651	CG9672	-1.29327	2.67265e-09	8.57306	Down
38264	CG1139	-1.29617	0.000280368	3.55227	Down
318014	Cpr65Av	-1.29836	0.000522437	3.28197	Down
36477	CG4734	-1.3017	3.66815e-08	7.43555	Down
32621	CG9903	-1.30628	8.48096e-05	4.07156	Down
35820	Lcp4	-1.30828	5.89245e-09	8.2297	Down
42053	CG5225	-1.30843	0.000874089	3.05844	Down
34801	CG7953	-1.3145	3.7066e-09	8.43102	Down
47198	Sgs7	-1.32228	0.00189108	2.72329	Down
35835	Cyp6a14	-1.32858	3.12532e-10	9.50511	Down
37625	CG9826	-1.33261	4.29673e-21	20.3669	Down
39802	CG13060	-1.33468	0.00487946	2.31163	Down
49815	Cht4	-1.34064	1.11335e-06	5.95337	Down
34055	CG7203	-1.34867	2.72354e-06	5.56487	Down
42913	CG17781	-1.36708	0.00344198	2.46319	Down
41789	CG14855	-1.372	0.000114449	3.94139	Down
34799	CG8997	-1.37358	5.15325e-09	8.28792	Down
42248	CG34282	-1.37739	1.99665e-08	7.6997	Down
36973	CG4847	-1.37901	6.65128e-14	13.1771	Down
38128	LysE	-1.39391	0.000633383	3.19833	Down
50315	CG15212	-1.39735	1.91582e-12	11.7176	Down
42351	CG6300	-1.40432	1.14846e-05	4.93988	Down
34800	CG7916	-1.40439	1.08052e-08	7.96637	Down
35819	Lcp3	-1.40862	8.96136e-09	8.04763	Down
38710	Acp65Aa	-1.4232	0.000120288	3.91978	Down
34811	CG16885	-1.42458	2.09776e-12	11.6782	Down
42852	Hsp68	-1.43317	1.27698e-05	4.89382	Down
40394	CG7634	-1.43658	0.00064662	3.18935	Down
10178932	MtnE	-1.44156	5.52658e-05	4.25754	Down
37213	CG18607	-1.45379	4.51079e-07	6.34575	Down
31853	CG12115	-1.46106	1.98564e-06	5.7021	Down
42451	CG4000	-1.4706	1.84642e-13	12.7337	Down
36686	CG8093	-1.48311	1.62937e-09	8.78798	Down
43247	CG6295	-1.48615	1.14442e-05	4.94141	Down
318094	TwdlX	-1.48932	7.40946e-11	10.1302	Down
37392	Cht9	-1.49512	1.62763e-11	10.7884	Down
14462470	CG44215	-1.5019	5.88762e-08	7.23006	Down
42628	CG13856	-1.51425	1.32303e-05	4.87843	Down
38706	Cpr65Aw	-1.52726	5.66564e-09	8.24675	Down
36934	Cda9	-1.53132	1.48381e-11	10.8286	Down
42352	CG11659	-1.53358	3.28833e-08	7.48303	Down
36326	CG43316	-1.54111	0.000388486	3.41062	Down
43251	CG6277	-1.55215	1.66977e-06	5.77734	Down
38709	Lcp65Aa	-1.55899	1.85829e-16	15.7309	Down
41934	CG34276	-1.56458	2.287e-05	4.64073	Down
35827	Mal-A4	-1.56801	6.30231e-11	10.2005	Down
40355	Cpr78Cc	-1.56818	1.46828e-05	4.83319	Down
32421	CG14406	-1.61498	0.000267987	3.57189	Down
34204	LManIV	-1.61588	2.78473e-08	7.55522	Down
37496	CG13488	-1.62821	1.69547e-08	7.77071	Down
31498	CG15772	-1.63623	3.36891e-06	5.47251	Down
3346166	CG14300	-1.65565	5.59834e-16	15.2519	Down
43250	CG6283	-1.66579	2.33668e-09	8.6314	Down
33874	AANATL2	-1.68031	5.88146e-07	6.23051	Down
39719	CG13445	-1.68634	0.000122536	3.91174	Down
38584	CG32237	-1.71562	1.51475e-06	5.81966	Down
12798419	CG43315	-1.73429	9.62439e-09	8.01663	Down
5740365	CG34267	-1.73482	1.54026e-05	4.81241	Down
33547	CG3285	-1.7365	7.10524e-15	14.1484	Down
43480	CG11470	-1.75172	1.27886e-13	12.8932	Down
39545	CG17362	-1.75734	4.97146e-06	5.30352	Down
39124	CG18179	-1.80269	1.93544e-07	6.71322	Down
35826	Mal-A3	-1.83107	1.00008e-14	14	Down
31340	yin	-1.83421	4.22419e-10	9.37426	Down
33205	CG11912	-1.87591	2.052e-10	9.68782	Down
38125	LysB	-1.92807	3.32541e-07	6.47816	Down
47764	Amy-p	-1.93167	6.65128e-14	13.1771	Down
35853	Jon44E	-1.93495	8.69751e-14	13.0606	Down
36863	Amyrel	-1.9475	1.49809e-14	13.8245	Down
37963	Lcp9	-1.97495	8.84307e-16	15.0534	Down
36101	CG12896	-1.98935	2.4256e-08	7.61518	Down
45018	Lcp65Ae	-2.04128	4.69738e-07	6.32814	Down
32714	CG10597	-2.06338	1.32891e-17	16.8765	Down
43252	CG6271	-2.08187	1.43324e-14	13.8437	Down
36099	CG11825	-2.09272	3.04107e-14	13.517	Down
40989	Ctr1B	-2.10025	2.61864e-13	12.5819	Down
36345	Cpr49Ab	-2.10246	3.12526e-07	6.50511	Down
50237	CG13230	-2.11177	2.5063e-10	9.60097	Down
42782	CG10183	-2.11886	2.43468e-09	8.61356	Down
36098	Prx2540-2	-2.19667	2.36599e-41	40.626	Down
36932	Amy-d	-2.20866	9.13672e-17	16.0392	Down
41202	MtnA	-2.22754	3.11078e-13	12.5071	Down
47901	betaTry	-2.23599	3.813e-30	29.4187	Down
48382	Lcp65Ab1	-2.29058	2.12046e-23	22.6736	Down
43388	CG9988	-2.41095	1.87032e-15	14.7281	Down
42097	CG5866	-2.61206	3.11078e-13	12.5071	Down
43248	CG17192	-2.65079	1.76265e-14	13.7538	Down
41643	Lip3	-2.85592	4.67907e-22	21.3298	Down
5740141	CG34268	-2.92391	1.30131e-16	15.8856	Down
41110	CG12951	-3.45756	5.9383e-36	35.2263	Down

## Sheet: Dataset S2
Dataset S2. DSGs identified by RNA-Seq on Dcnt1 knockdown
GeneID	Symbol	Alternative Splicing Event
2768671	Pxd	A3SS
34187	Uba4	A3SS
43841	unc-13	A3SS
3772382	Plp	A3SS
41595	yellow-f	A3SS
38528	Hexo1	A3SS
39153	CG43897	A3SS
33659	ine	A3SS
38820	Sh3beta	A3SS
38456	Ubi-p63E	A3SS
44039	Pak	A5SS
30975	ewg	A5SS
44448	scrib	A5SS
43243	CG14253	A5SS
43800	CG1909	A5SS
41749	cv-c	A5SS
31957	alpha-Man-Ia	A5SS
37892	mAChR-A	A5SS
42046	EMC2A	A5SS
7354434	OtopLc	A5SS
34012	ninaC	A5SS
35402	Mondo	A5SS
43324	unc80	A5SS
40787	CRAT	A5SS
38456	Ubi-p63E	A5SS
45884	kkv	A5SS
46068	Acsl	A5SS
318193	CG32756	MXE
40149	verm	MXE
35652	Dscam1	MXE
41749	cv-c	MXE
32532	sordd1	MXE
32217	Tomosyn	MXE
41225	Mical	MXE
40583	smash	MXE
38456	Ubi-p63E	MXE
34686	MRP	MXE
40433	Nopp140	RI
49805	Spn42Da	RI
8673977	CG42586	RI
39856	Su(P)	RI
40240	eRF1	RI
41202	MtnA	RI
50005	CG8369	RI
32437	Lsd-2	RI
33765	fusl	RI
43800	CG1909	RI
39153	CG43897	RI
41749	cv-c	RI
44258	ps	RI
31957	alpha-Man-Ia	RI
33659	ine	RI
33148	fog	RI
39842	mbf1	RI
36437	CG13325	RI
39662	CG7255	RI
38456	Ubi-p63E	RI
45884	kkv	RI
41938	Sap47	RI
39551	upSET	RI
38369	PAN3	SE
43828	CaMKII	SE
40149	verm	SE
43841	unc-13	SE
48971	Atpalpha	SE
49070	Mbs	SE
41225	Mical	SE
40583	smash	SE
39304	Akr1B	SE
38456	Ubi-p63E	SE
46194	Spn	SE
33062	shakB	SE
32285	IP3K2	SE
34677	PICK1	SE

## Sheet: Dataset S3
Dataset S3. DSGs with a synaptic function downstream of Dcnt1 knockdown.
GeneID	Symbol	Name	Alternative Splicing Event	Function
37892	mAChR-A	muscarinic Acetylcholine Receptor, A-type	A5SS	Encoded protein is involved in G protein-coupled acetylcholine receptor signaling pathway.
48971	Atpalpha	Na pump α subunit	SE	Encoded protein is an integral membrane cation antiporter protein that utilizes ATP to shuttle Na[+] and K[+] across the plasma membrane to maintain ion homeostasis.
41938	Sap47	Synapse-associated protein 47kD	RI	Encoded protein associates with synaptic vesicles, and is required for intact synaptic and behavioural plasticity.
43841	unc-13	unc-13	A3SS, SE	Encoded protein is involved in synaptic vesicle exocytosis.
32217	Tomosyn	Tomosyn	MXE	Encoded protein is involved in long-term memory and neuromuscular synaptic transmission.
33765	fusl	fuseless	RI	Encoded protein is involved in the clustering of voltage-gated calcium channels and the exocytosis of calcium-dependent synaptic vesicles.
43800	CG1909	N/A	A5SS, RI	Encoded protein is predicted to be involved in cholinergic synaptic transmission and positive regulation of neuromuscular synaptic transmission.
46068	Acsl	Acyl-CoA synthetase long-chain	A5SS	Encoded protein regulates axonal transport of synaptic vesicles and is required for synaptic development and transmission.
43828	CaMKII	Calcium/calmodulin-dependent protein kinase II	SE	Encoded protein enables calmodulin-dependent protein kinase activity and is synaptic transmission.
41749	cv-c	crossveinless c	A5SS, MXE, RI	Encoded protein is a RhoGTPase activating protein that regulates synaptic homeostasis at the neuromuscular junction.
44448	scrib	scribble	A5SS	Encoded protein organizes synaptic architecture and is implicated in learning and memory.
44039	Pak	p21-activated kinase	A5SS	Encoded protein contributes to growth cone guidance and synaptic development.
30975	ewg	erect wing	A5SS	Encoded protein is a transcription factor that is essential for synaptic growth at neuromuscular junctions.
46194	Spn	Spinophilin	SE	Encoded protein is a scaffold protein protein that regulates the neurexin/neuroligin signalling at the presynaptic active zone.
34677	PICK1	Protein interacting with C kinase 1	SE	Encoded protein is involved in the regulation of postsynapse organization.
41225	Mical	Molecule interacting with CasL	MXE, SE	Encoded protein has actin binding activity and is involved in synapse assembly.
